# Supplementary material for: Association between home insulation and hospital admission rates: retrospective cohort study using linked data from a national intervention programme
Source: PubMed Central journal article supplement — BMJ. 2020 Dec 29;371:m4571. doi: 10.1136/bmj.m4571 (PMC7770561; doi:10.1136/bmj.m4571), 2020-12-29
Supplement: fyfc053786.wt1.pdf [file fyfc053786.wt1.pdf]

| Cohort                                | Group and follow-up period | Total person years | Hospitalisation count | Hospitalisation rate per 1000 person years (95% CI) | Rate ratio (RR) (follow-up/baseline) | Relative rate ratio RRR (RR intervention/RR follow-up) |
|---------------------------------------|----------------------------|--------------------|-----------------------|-----------------------------------------------------|--------------------------------------|--------------------------------------------------------|
| Died during the study                 | baseline intervention      | 7495.5             | 7818                  | 960.4 (899.8-1025.1)**                              | <b>1.25 (1.21-1.29)**</b>            | <b>1.09 (1.05-1.14)*</b>                               |
|                                       | follow-up intervention     | 7425.5             | 9793                  | 1210.1 (1134.5-1290.8)**                            |                                      |                                                        |
|                                       | baseline control           | 6596.25            | 6942                  | 949.2 (889.4-1013.1)**                              | <b>1.14 (1.11-1.12)**</b>            |                                                        |
|                                       | follow-up control          | 6335.25            | 7610                  | 1092.9 (1023.9-1166.6)**                            |                                      |                                                        |
| Total population (inc. died in study) | baseline intervention      | 708919             | 64613                 | 83.7 (82.1-85.3)**                                  | <b>1.07 (1.05-1.08)**</b>            | <b>0.91 (0.89-0.93)**</b>                              |
|                                       | follow-up intervention     | 743569             | 73677                 | 89.2 (87.5-90.9)**                                  |                                      |                                                        |
|                                       | baseline control           | 691819             | 57914                 | 79.3 (77.7-80.8)**                                  | <b>1.16 (1.15-1.18)**</b>            |                                                        |
|                                       | follow-up control          | 707465             | 70971                 | 92.4 (90.7-94.2)**                                  |                                      |                                                        |
| Total population (exc. died in study) | baseline intervention      | 700222             | 56881                 | 78.9 (78.9-79.9)**                                  | <b>1.05 (1.04-1.06)**</b>            | <b>0.89 (0.87-0.91)**</b>                              |
|                                       | follow-up intervention     | 734969             | 63766                 | 83.1 (82.1-84.0)**                                  |                                      |                                                        |
|                                       | baseline control           | 684642             | 50922                 | 73.8 (72.8-74.7)**                                  | <b>1.18 (1.17-1.20)**</b>            |                                                        |
|                                       | follow-up control          | 700470             | 63304                 | 87.2 (86.2-88.2)**                                  |                                      |                                                        |

Supplementary table 1: Unadjusted hospitalisation rates per 1000 person years for different cohorts within the WUNZ population.
